# Supplementary material
Source: MDPI journal article supplement (https://www.mdpi.com/2304-6740/12/2/56)
Supplement: s1 [file s1]

# Theoretical Study on the Structures and Stabilities of $\text{Cu}_n\text{Zn}_3\text{O}_3$ ( $n = 1 - 4$ ) Clusters: Sequential Doping of $\text{Zn}_3\text{O}_3$ Cluster with Cu Atoms

Zhi-Wei Tao<sup>1</sup>, Han-Yi Zou<sup>1</sup>, Hong-Hui Li<sup>1</sup>, Bin Wang<sup>1,\*</sup> and Wen-Jie Chen<sup>2,\*</sup>

<sup>1</sup> College of Chemistry, Fuzhou University, Fuzhou, Fujian, 350108, P. R. China

<sup>2</sup> Department of Material Chemistry, College of Chemical Engineering and Materials, Quanzhou Normal University, Quanzhou, Fujian, 362000, P. R. China

\* Correspondence: wangbin\_100@fzu.edu.cn (B.W.); chenwenjie@qztc.edu.cn (W.J.C.)

## Supplementary Materials

**Table S1** Calculated results at B3LYP/BS level for the bond lengths ( $d$ ), binding energies ( $E_b$ ), vibrational frequencies ( $\omega_e$ ) and dipole moments ( $\mu$ ) of ZnO and CuO along with the corresponding available experimental data.

**Table S2** Relative energies of  $\text{Cu}_n\text{Zn}_3\text{O}_3$  ( $n = 1-4$ ) clusters at the B3LYP/BS level ( $\Delta E < 0.50$  eV) and those in the CCSD(T) single-point calculations.

**Table S3** The calculated d-band centers for the spin up ( $\alpha$ ), spin down ( $\beta$ ) and both spin modes (*total*).

**Figure S1** Alternative optimized structures for  $\text{CuZn}_3\text{O}_3$  at the B3LYP/BS level. The bond lengths are in angstroms.

**Figure S2** Alternative optimized structures for  $\text{Cu}_2\text{Zn}_3\text{O}_3$  at the B3LYP/BS level. The bond lengths are in angstroms.

**Figure S3** Alternative optimized structures for  $\text{Cu}_3\text{Zn}_3\text{O}_3$  at the B3LYP/BS level. The bond lengths are in angstroms.

**Figure S4** Alternative optimized structures for  $\text{Cu}_4\text{Zn}_3\text{O}_3$  at the B3LYP/BS level. The bond lengths are in angstroms.

**Table S4** Cartesian coordinates for the optimized  $\text{Cu}_n\text{Zn}_3\text{O}_3$  ( $n = 0-4$ ) clusters.

**Table S1** Calculated results at B3LYP/BS level for the bond lengths ( $d$ ), binding energies ( $E_b$ ), vibrational frequencies ( $\omega_e$ ) and dipole moments ( $\mu$ ) of ZnO and CuO along with the corresponding available experimental data.

| Molecule | Method     | $d$ (Å)            | $E_b$ (eV)        | $\omega_e$ (cm <sup>-1</sup> ) | $\mu$ (Debyes)    |
|----------|------------|--------------------|-------------------|--------------------------------|-------------------|
| ZnO      | B3LYP/BS   | 1.700              | 1.24              | 741                            | 5.61              |
|          | Experiment | 1.705 <sup>a</sup> | $1.61 \pm 0.04^b$ | 738 <sup>a</sup>               | /                 |
| CuO      | B3LYP/BS   | 1.719              | 2.98              | 639                            | 4.53              |
|          | Experiment | 1.724 <sup>c</sup> | $2.85 \pm 0.15^b$ | 640 <sup>c</sup>               | $4.45 \pm 0.30^d$ |

<sup>a</sup> Zack, L.N.; Pulliam, R.L.; Ziurys, L.M. *Journal of Molecular Spectroscopy*, 2009, 256, 186-191.

<sup>b</sup> Clemmer, D.E.; Dalleska, N.F.; Armentrout, P.B. *The Journal of Chemical Physics*, 1991, 95, 7263-7268.

<sup>c</sup> Huber, K.P.; Herzberg, G. Constants of diatomic molecules. In *Molecular Spectra and Molecular Structure: IV. Constants of Diatomic Molecules*, Huber, K.P., Herzberg, G., Eds.; Springer US: Boston, MA, 1979; pp. 8-689.

<sup>d</sup> Steimle, T.C.; Nachman, D.F.; Fletcher, D.A. *The Journal of Chemical Physics*, 1987, 87, 5670-5673.

**Table S2** Relative energies of Cu<sub>n</sub>Zn<sub>3</sub>O<sub>3</sub> ( $n = 1-4$ ) clusters at the B3LYP/BS level ( $\Delta E \leq 0.50$  eV) and those in the CCSD(T) single-point calculations.

| Cluster                                                                 | B3LYP/BS <sup>a</sup> | CCSD(T) <sup>a,b</sup> |
|-------------------------------------------------------------------------|-----------------------|------------------------|
| CuZn <sub>3</sub> O <sub>3</sub> ( $C_s$ <sup>2</sup> A')               | <b>0.00</b>           | <b>0.00</b>            |
| ( $C_1$ <sup>2</sup> A)                                                 | 0.50                  | 0.16                   |
| Cu <sub>2</sub> Zn <sub>3</sub> O <sub>3</sub> ( $C_s$ <sup>1</sup> A') | <b>0.00</b>           | <b>0.00</b>            |
| ( $C_1$ <sup>1</sup> A)                                                 | 0.39                  | 0.03                   |
| Cu <sub>3</sub> Zn <sub>3</sub> O <sub>3</sub> ( $C_1$ <sup>2</sup> A)  | <b>0.00</b>           | <b>0.00</b>            |
| ( $C_1$ <sup>2</sup> A)                                                 | 0.20                  | 0.69                   |
| ( $C_1$ <sup>2</sup> A)                                                 | 0.20                  | 0.45                   |
| ( $C_1$ <sup>2</sup> A)                                                 | 0.22                  | 0.42                   |
| ( $C_1$ <sup>2</sup> A)                                                 | 0.30                  | 0.54                   |
| ( $C_1$ <sup>2</sup> A)                                                 | 0.31                  | 0.65                   |
| ( $C_1$ <sup>2</sup> A)                                                 | 0.33                  | 0.57                   |
| ( $C_1$ <sup>2</sup> A)                                                 | 0.44                  | 0.68                   |
| ( $C_1$ <sup>2</sup> A)                                                 | 0.45                  | 0.72                   |
| ( $C_1$ <sup>2</sup> A)                                                 | 0.47                  | 0.76                   |
| Cu <sub>4</sub> Zn <sub>3</sub> O <sub>3</sub> ( $C_1$ <sup>1</sup> A)  | <b>0.00</b>           | <b>0.00</b>            |
| ( $C_1$ <sup>1</sup> A)                                                 | 0.10                  | 0.28                   |
| ( $C_1$ <sup>1</sup> A)                                                 | 0.41                  | 0.04                   |
| ( $C_1$ <sup>1</sup> A)                                                 | 0.43                  | 0.63                   |

<sup>a</sup> All energies are in eV.

<sup>b</sup> CCSD(T) single-point calculations at the B3LYP/BS geometries.

**Table S3** The calculated d-band centers for the spin up ( $\alpha$ ), spin down ( $\beta$ ) and both spin modes (*total*)

| $\varepsilon_d$ (eV) | Zn <sub>3</sub> O <sub>3</sub> | CuZn <sub>3</sub> O <sub>3</sub> | Cu <sub>2</sub> Zn <sub>3</sub> O <sub>3</sub> | Cu <sub>3</sub> Zn <sub>3</sub> O <sub>3</sub> | Cu <sub>4</sub> Zn <sub>3</sub> O <sub>3</sub> |
|----------------------|--------------------------------|----------------------------------|------------------------------------------------|------------------------------------------------|------------------------------------------------|
| $\alpha$             | -6.16                          | -5.84                            | -4.83                                          | -5.31                                          | -4.09                                          |
| $\beta$              | -6.16                          | -5.09                            | -4.83                                          | -4.66                                          | -4.09                                          |
| <i>total</i>         | -6.16                          | -5.72                            | -4.83                                          | -5.25                                          | -4.09                                          |

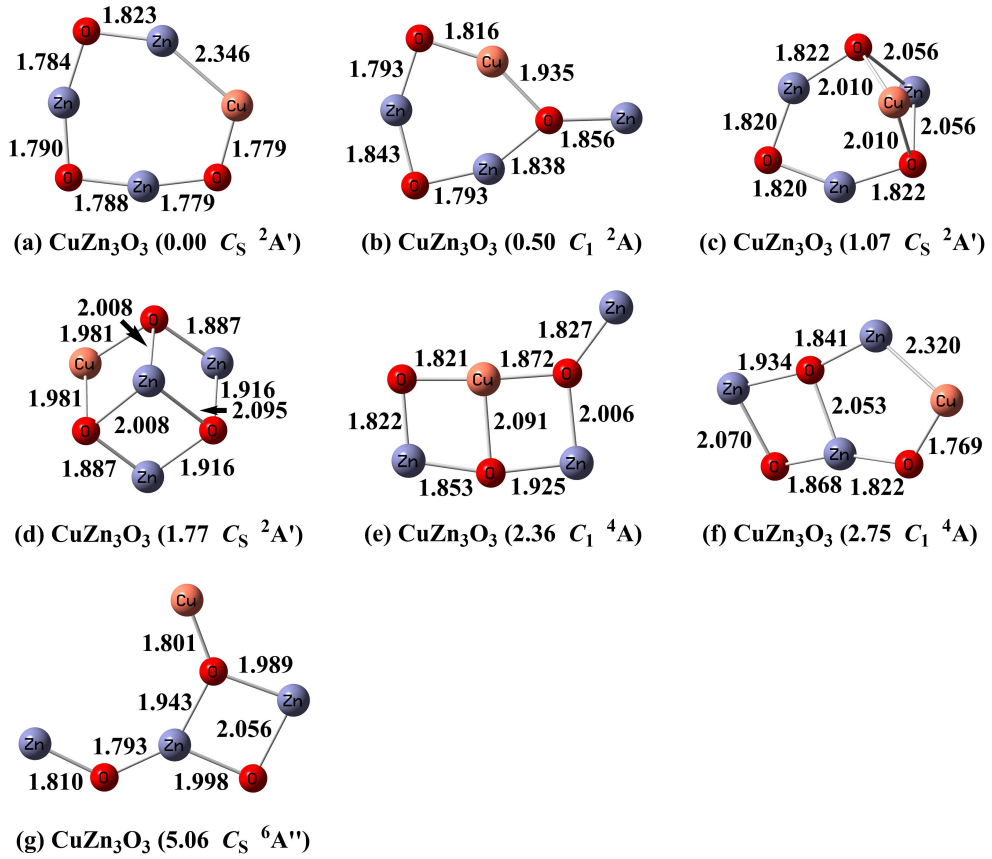

**Figure S1** Alternative optimized structures for CuZn<sub>3</sub>O<sub>3</sub> at the B3LYP/BS level. The bond lengths are in angstroms.

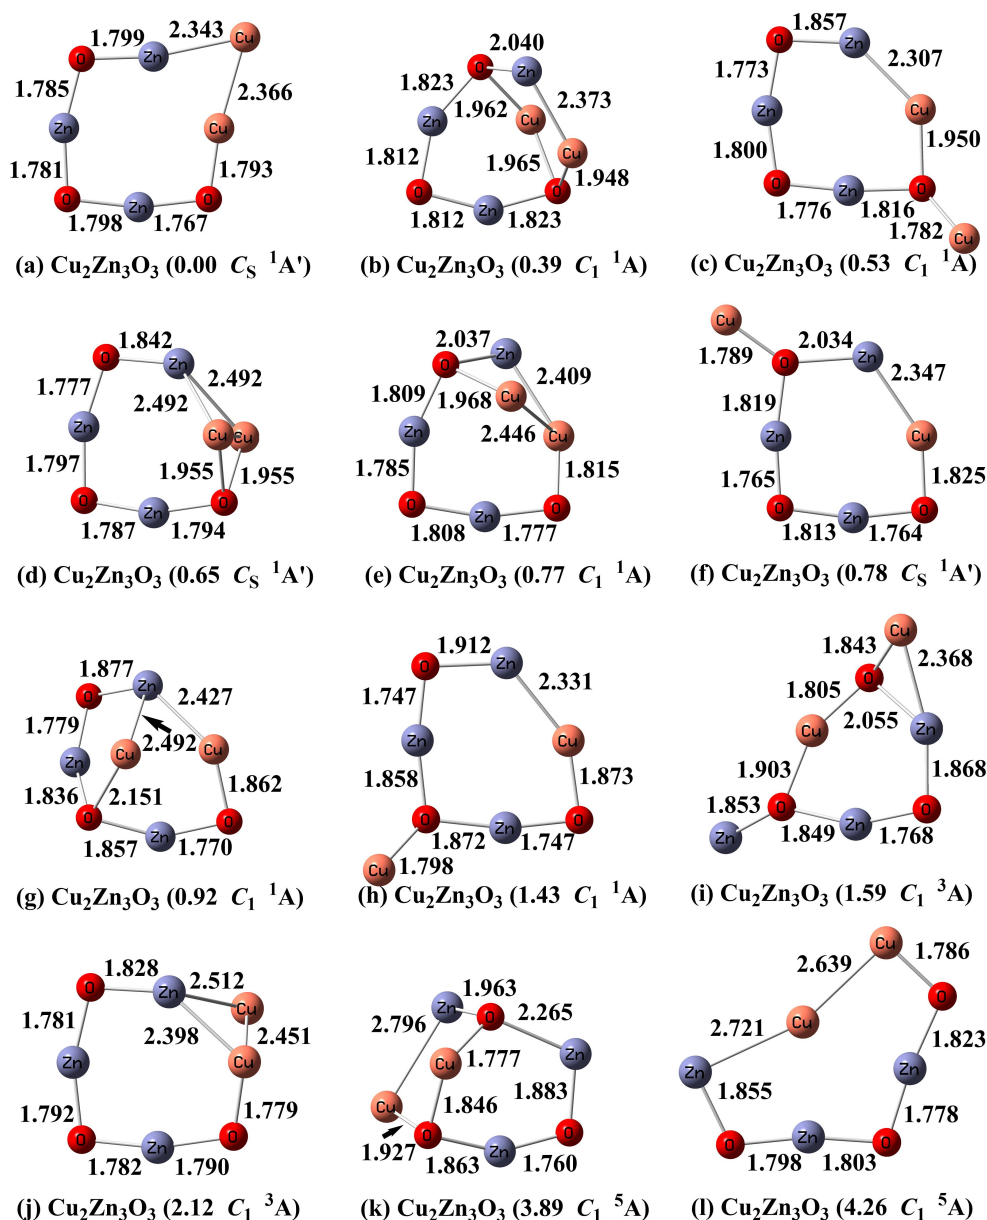

**Figure S2** Alternative optimized structures for  $\text{Cu}_2\text{Zn}_3\text{O}_3$  at the B3LYP/BS level. The bond lengths are in angstroms.

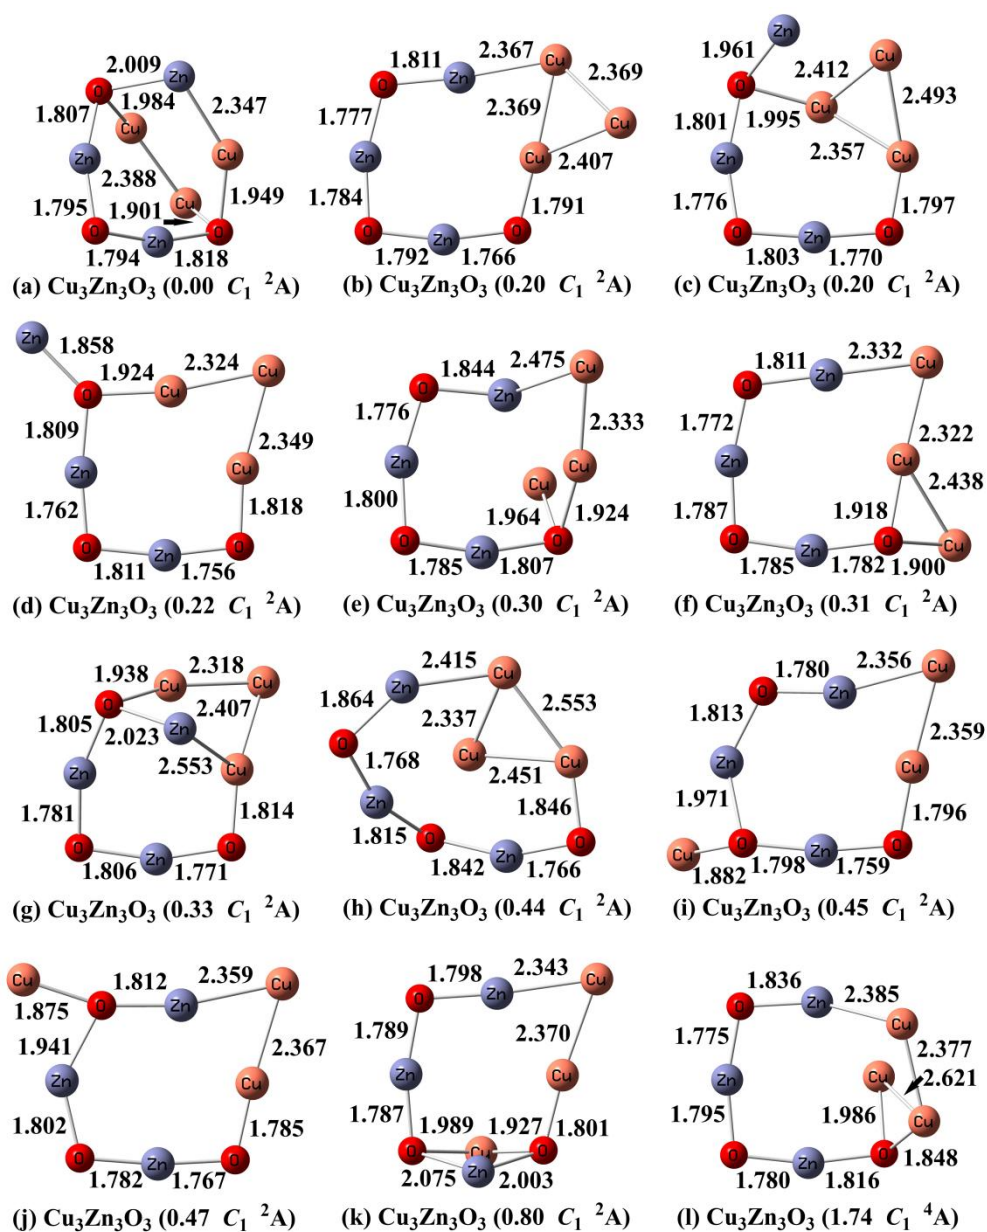

**Figure S3** Alternative optimized structures for  $\text{Cu}_3\text{Zn}_3\text{O}_3$  at the B3LYP/BS level. The bond lengths are in angstroms. (Continued)

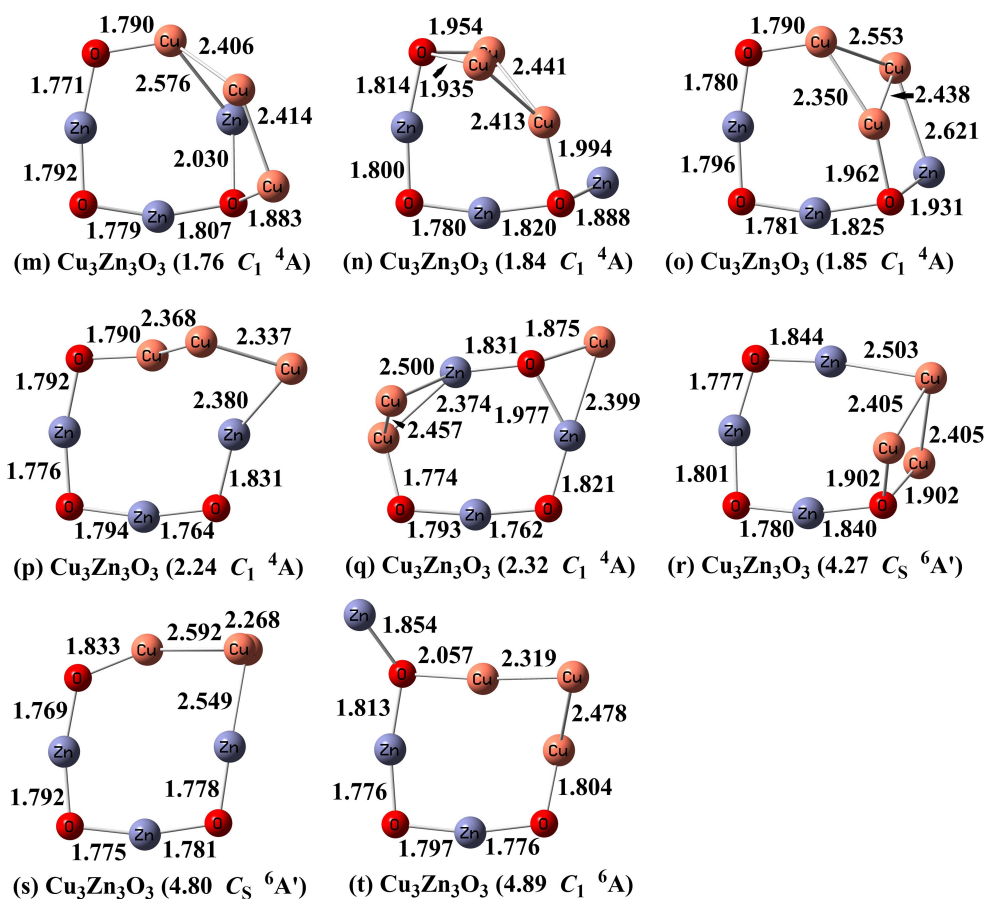

**Figure S3** Alternative optimized structures for  $\text{Cu}_3\text{Zn}_3\text{O}_3$  at the B3LYP/BS level. The bond lengths are in angstroms.

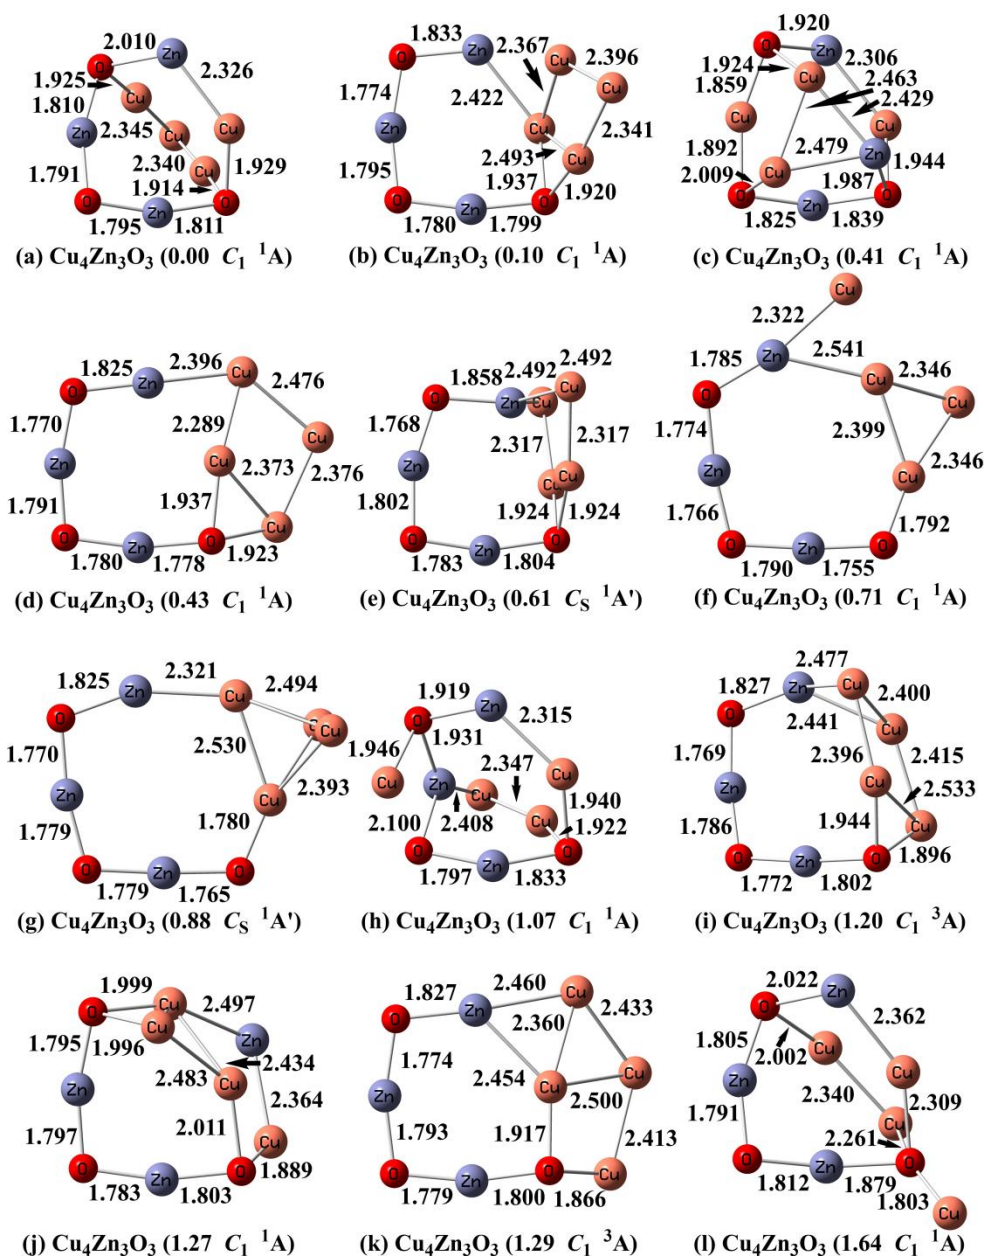

**Figure S4** Alternative optimized structures for  $\text{Cu}_4\text{Zn}_3\text{O}_3$  at the B3LYP/BS level. The bond lengths are in angstroms. (Continued)



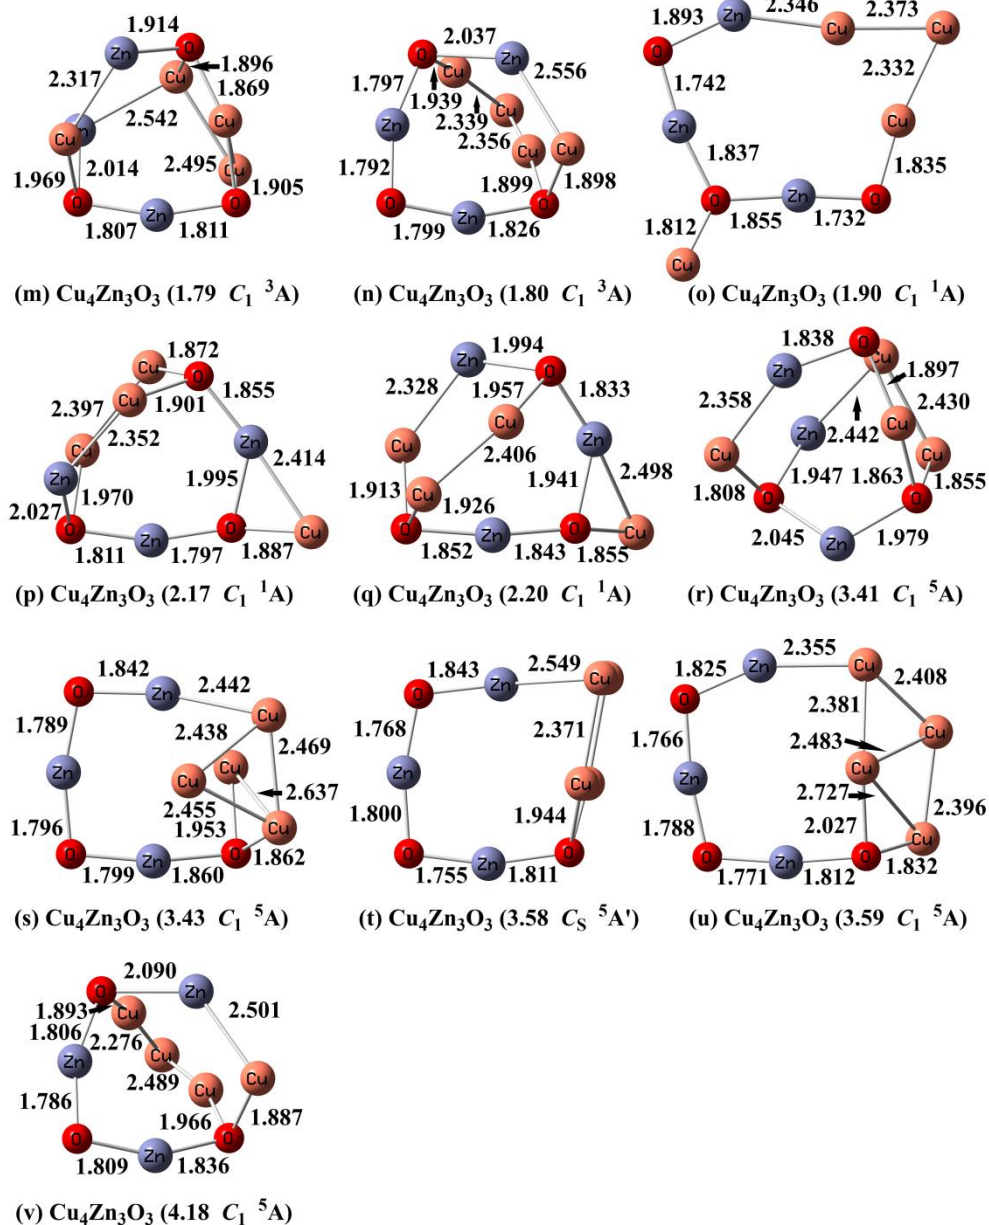

**Figure S4** Alternative optimized structures for  $\text{Cu}_4\text{Zn}_3\text{O}_3$  at the B3LYP/BS level. The bond lengths are in angstroms.



**Table S4** Cartesian coordinates for the optimized  $\text{Cu}_n\text{Zn}_3\text{O}_3$  ( $n = 0-4$ ) clusters.

| <b><math>\text{Zn}_3\text{O}_3</math></b>                                           |              |              |             |
|-------------------------------------------------------------------------------------|--------------|--------------|-------------|
| <b><math>\text{Zn}_3\text{O}_3</math> (<math>D_{3h}</math> <math>^1A_1'</math>)</b> |              |              |             |
| O                                                                                   | -1.003335000 | -1.737755000 | 0.000000000 |
| O                                                                                   | -1.003335000 | 1.737755000  | 0.000000000 |
| O                                                                                   | 2.006738000  | 0.000000000  | 0.000000000 |
| Zn                                                                                  | -1.532402000 | 0.000000000  | 0.000000000 |
| Zn                                                                                  | 0.766192000  | -1.327119000 | 0.000000000 |
| Zn                                                                                  | 0.766192000  | 1.327119000  | 0.000000000 |

| <b><math>\text{CuZn}_3\text{O}_3</math></b>                                              |              |              |             |
|------------------------------------------------------------------------------------------|--------------|--------------|-------------|
| <b><math>\text{CuZn}_3\text{O}_3</math> (0.00 eV <math>C_s</math> <math>^2A'</math>)</b> |              |              |             |
| O                                                                                        | 1.986864000  | -1.139782000 | 0.000000000 |
| O                                                                                        | -1.464987000 | -1.932363000 | 0.000000000 |
| O                                                                                        | -1.814022000 | 1.563489000  | 0.000000000 |
| Zn                                                                                       | 0.312282000  | -1.740960000 | 0.000000000 |
| Zn                                                                                       | 0.000000000  | 1.741676000  | 0.000000000 |
| Zn                                                                                       | -1.968793000 | -0.214245000 | 0.000000000 |
| Cu                                                                                       | 2.070086000  | 0.637072000  | 0.000000000 |

| <b><math>\text{CuZn}_3\text{O}_3</math> (0.50 eV <math>C_1</math> <math>^2A</math>)</b> |              |              |              |
|-----------------------------------------------------------------------------------------|--------------|--------------|--------------|
| O                                                                                       | -1.842215000 | -1.756624000 | 0.014823000  |
| O                                                                                       | -1.819712000 | 1.738781000  | 0.032881000  |
| O                                                                                       | 1.296203000  | 0.075163000  | -0.119825000 |
| Zn                                                                                      | -2.331722000 | -0.031894000 | 0.043845000  |
| Zn                                                                                      | 3.140818000  | -0.038838000 | 0.050956000  |
| Zn                                                                                      | -0.087704000 | 1.282425000  | -0.038579000 |
| Cu                                                                                      | -0.093653000 | -1.269288000 | -0.038265000 |

| <b><math>\text{CuZn}_3\text{O}_3</math> (1.07 eV <math>C_s</math> <math>^2A'</math>)</b> |              |              |              |
|------------------------------------------------------------------------------------------|--------------|--------------|--------------|
| O                                                                                        | 0.002265000  | -0.726328000 | 1.529987000  |
| O                                                                                        | 0.002265000  | -0.726328000 | -1.529987000 |
| O                                                                                        | -0.015248000 | 2.360546000  | 0.000000000  |
| Zn                                                                                       | -1.216429000 | -1.359674000 | 0.000000000  |
| Zn                                                                                       | 0.002265000  | 1.080573000  | 1.293891000  |
| Zn                                                                                       | 0.002265000  | 1.080573000  | -1.293891000 |
| Cu                                                                                       | 1.256646000  | -1.079562000 | 0.000000000  |

| <b><math>\text{CuZn}_3\text{O}_3</math> (1.77 eV <math>C_s</math> <math>^2A'</math>)</b> |              |              |              |
|------------------------------------------------------------------------------------------|--------------|--------------|--------------|
| O                                                                                        | 0.876888000  | -1.462564000 | 0.000000000  |
| O                                                                                        | -0.088964000 | 0.873388000  | 1.562932000  |
| O                                                                                        | -0.088964000 | 0.873388000  | -1.562932000 |

|    |              |              |              |
|----|--------------|--------------|--------------|
| Zn | -0.088964000 | -1.013560000 | 1.592311000  |
| Zn | -0.088964000 | -1.013560000 | -1.592311000 |
| Zn | 1.145569000  | 0.615037000  | 0.000000000  |
| Cu | -1.193825000 | 1.382371000  | 0.000000000  |

**CuZn<sub>3</sub>O<sub>3</sub> (2.36 eV C<sub>1</sub> <sup>4</sup>A)**

|    |              |              |              |
|----|--------------|--------------|--------------|
| O  | 1.336664000  | 0.011675000  | -0.000100000 |
| O  | -1.893514000 | -1.772054000 | -0.000022000 |
| O  | -1.267916000 | 1.034646000  | 0.000032000  |
| Zn | 3.024325000  | -0.688099000 | 0.000042000  |
| Zn | 0.485649000  | 1.828228000  | -0.000012000 |
| Zn | -2.702061000 | -0.139010000 | 0.000037000  |
| Cu | -0.332388000 | -0.835438000 | -0.000044000 |

**CuZn<sub>3</sub>O<sub>3</sub> (2.75 eV C<sub>1</sub> <sup>4</sup>A)**

|    |              |              |              |
|----|--------------|--------------|--------------|
| O  | 1.504591000  | 1.541126000  | -0.153627000 |
| O  | -0.818549000 | -0.769423000 | 0.031267000  |
| O  | -2.100353000 | 1.430843000  | 0.369035000  |
| Zn | 0.890387000  | -1.450749000 | 0.101919000  |
| Zn | -0.278530000 | 1.211622000  | 0.019771000  |
| Zn | -2.724211000 | -0.479494000 | -0.126939000 |
| Cu | 2.575348000  | 0.135802000  | -0.062619000 |

**CuZn<sub>3</sub>O<sub>3</sub> (5.06 eV C<sub>s</sub> <sup>6</sup>A'')**

|    |              |              |             |
|----|--------------|--------------|-------------|
| O  | -0.871512000 | -0.808319000 | 0.000000000 |
| O  | -1.838220000 | 1.711487000  | 0.000000000 |
| O  | 1.618171000  | 1.701187000  | 0.000000000 |
| Zn | -2.742814000 | -0.134516000 | 0.000000000 |
| Zn | 3.250168000  | 0.917770000  | 0.000000000 |
| Zn | 0.000000000  | 0.928320000  | 0.000000000 |
| Cu | -0.223728000 | -2.489037000 | 0.000000000 |

**Cu<sub>2</sub>Zn<sub>3</sub>O<sub>3</sub>**

**Cu<sub>2</sub>Zn<sub>3</sub>O<sub>3</sub> (0.00 eV C<sub>s</sub> <sup>1</sup>A')**

|    |              |              |             |
|----|--------------|--------------|-------------|
| O  | -1.176162000 | -2.117461000 | 0.000000000 |
| O  | 2.360354000  | -1.904257000 | 0.000000000 |
| O  | 1.798270000  | 1.576879000  | 0.000000000 |
| Zn | 0.588499000  | -2.210679000 | 0.000000000 |
| Zn | 0.000000000  | 1.526329000  | 0.000000000 |
| Zn | 2.340962000  | -0.123374000 | 0.000000000 |
| Cu | -1.536078000 | -0.361421000 | 0.000000000 |
| Cu | -2.317148000 | 1.871436000  | 0.000000000 |

**Cu<sub>2</sub>Zn<sub>3</sub>O<sub>3</sub> (0.39 eV C<sub>1</sub> <sup>1</sup>A)**

|    |              |              |              |
|----|--------------|--------------|--------------|
| O  | 0.160095000  | -1.890211000 | 0.618540000  |
| O  | 2.439513000  | 0.341744000  | -0.852010000 |
| O  | -0.369673000 | 1.758668000  | 0.686445000  |
| Zn | -1.849379000 | 0.974459000  | -0.479159000 |
| Zn | 1.209557000  | 1.493007000  | -0.185232000 |
| Zn | 1.556765000  | -1.132334000 | -0.275218000 |
| Cu | -0.203256000 | -0.091055000 | 1.319330000  |
| Cu | -1.360459000 | -1.348103000 | -0.472280000 |

**Cu<sub>2</sub>Zn<sub>3</sub>O<sub>3</sub> (0.53 eV C<sub>1</sub> <sup>1</sup>A)**

|    |              |              |              |
|----|--------------|--------------|--------------|
| O  | 1.871751000  | -0.086793000 | 0.354055000  |
| O  | -0.783633000 | 2.298503000  | 0.027691000  |
| O  | -3.174911000 | -0.290921000 | -0.165335000 |
| Zn | 0.608518000  | 1.203655000  | 0.162651000  |
| Zn | -1.790103000 | -1.521618000 | -0.044730000 |
| Zn | -2.191627000 | 1.182498000  | -0.086711000 |
| Cu | 0.509554000  | -1.462986000 | 0.123563000  |
| Cu | 3.555643000  | 0.038767000  | -0.215548000 |

**Cu<sub>2</sub>Zn<sub>3</sub>O<sub>3</sub> (0.65 eV C<sub>s</sub> <sup>1</sup>A')**

|    |              |              |              |
|----|--------------|--------------|--------------|
| O  | -1.492951000 | 1.478193000  | 0.000000000  |
| O  | -1.659937000 | -2.056780000 | 0.000000000  |
| O  | 1.850702000  | -1.736714000 | 0.000000000  |
| Zn | -1.850843000 | -0.280024000 | 0.000000000  |
| Zn | 1.809206000  | 0.104371000  | 0.000000000  |
| Zn | 0.132575000  | -2.188814000 | 0.000000000  |
| Cu | 0.132575000  | 1.542352000  | 1.154761000  |
| Cu | 0.132575000  | 1.542352000  | -1.154761000 |

**Cu<sub>2</sub>Zn<sub>3</sub>O<sub>3</sub> (0.77 eV C<sub>1</sub> <sup>1</sup>A)**

|    |              |              |              |
|----|--------------|--------------|--------------|
| O  | 1.212996000  | 2.143136000  | 0.189634000  |
| O  | 2.316304000  | -1.180200000 | -0.384226000 |
| O  | -1.123172000 | -1.667803000 | 0.172862000  |
| Zn | 1.998694000  | 0.579241000  | -0.115387000 |
| Zn | -1.992572000 | -0.108107000 | -0.806763000 |
| Zn | 0.643485000  | -1.775608000 | -0.202367000 |
| Cu | -0.496412000 | 1.684268000  | -0.211737000 |
| Cu | -0.839355000 | -0.140367000 | 1.381026000  |

**Cu<sub>2</sub>Zn<sub>3</sub>O<sub>3</sub> (0.78 eV C<sub>s</sub> <sup>1</sup>A')**

|   |              |              |             |
|---|--------------|--------------|-------------|
| O | -2.782502000 | -1.625798000 | 0.000000000 |
| O | -1.720029000 | 1.762392000  | 0.000000000 |
| O | 1.666572000  | 0.635034000  | 0.000000000 |

|    |              |              |             |
|----|--------------|--------------|-------------|
| Zn | -2.463275000 | 0.108860000  | 0.000000000 |
| Zn | 1.220690000  | -1.349990000 | 0.000000000 |
| Zn | 0.000000000  | 1.364946000  | 0.000000000 |
| Cu | -1.013141000 | -2.071000000 | 0.000000000 |
| Cu | 3.080907000  | 1.730051000  | 0.000000000 |

**Cu<sub>2</sub>Zn<sub>3</sub>O<sub>3</sub> (0.92 eV C<sub>1</sub> <sup>1</sup>A)**

|    |              |              |              |
|----|--------------|--------------|--------------|
| O  | 2.501010000  | 0.389621000  | -0.786039000 |
| O  | 0.146831000  | -1.922628000 | 0.435202000  |
| O  | -2.481858000 | 0.027656000  | -0.778101000 |
| Zn | 1.600827000  | -1.068903000 | -0.342275000 |
| Zn | -1.333689000 | 1.379467000  | -0.164908000 |
| Zn | -1.401323000 | -1.317584000 | -0.345609000 |
| Cu | 1.091996000  | 1.457270000  | -0.200796000 |
| Cu | 0.035510000  | -0.000257000 | 1.394426000  |

**Cu<sub>2</sub>Zn<sub>3</sub>O<sub>3</sub> (1.43 eV C<sub>1</sub> <sup>1</sup>A)**

|    |              |              |              |
|----|--------------|--------------|--------------|
| O  | 0.695474000  | 2.647692000  | -0.006364000 |
| O  | -1.639243000 | -0.071270000 | 0.323399000  |
| O  | 1.024116000  | -2.451057000 | 0.031152000  |
| Zn | -0.575703000 | 1.460498000  | 0.155549000  |
| Zn | 2.330267000  | -1.061735000 | -0.114689000 |
| Zn | -0.395646000 | -1.443139000 | 0.172801000  |
| Cu | 1.919696000  | 1.232469000  | -0.091692000 |
| Cu | -3.347638000 | -0.186663000 | -0.225388000 |

**Cu<sub>2</sub>Zn<sub>3</sub>O<sub>3</sub> (1.59 eV C<sub>1</sub> <sup>3</sup>A)**

|    |              |              |              |
|----|--------------|--------------|--------------|
| O  | 1.406630000  | -1.061532000 | 0.576809000  |
| O  | 0.630569000  | 2.328017000  | 0.073317000  |
| O  | -1.928902000 | -0.074779000 | -0.378540000 |
| Zn | -3.635212000 | -0.658251000 | 0.049076000  |
| Zn | -0.873883000 | 1.427687000  | -0.155748000 |
| Zn | 1.841173000  | 0.911059000  | 0.199674000  |
| Cu | -0.326157000 | -0.994842000 | 0.074371000  |
| Cu | 3.056201000  | -1.072348000 | -0.245501000 |

**Cu<sub>2</sub>Zn<sub>3</sub>O<sub>3</sub> (2.12 eV C<sub>1</sub> <sup>3</sup>A)**

|    |              |              |              |
|----|--------------|--------------|--------------|
| O  | 0.419279000  | 2.264625000  | -0.206282000 |
| O  | -2.654230000 | 0.647971000  | 0.507044000  |
| O  | -0.909108000 | -2.302173000 | -0.300905000 |
| Zn | -1.212052000 | 1.645390000  | 0.190992000  |
| Zn | 0.623260000  | -1.349018000 | -0.593881000 |
| Zn | -2.031657000 | -0.993883000 | 0.147396000  |
| Cu | 1.386745000  | 0.911045000  | -0.835823000 |

|    |             |              |             |
|----|-------------|--------------|-------------|
| Cu | 2.191390000 | -0.357874000 | 1.100166000 |
|----|-------------|--------------|-------------|

**Cu<sub>2</sub>Zn<sub>3</sub>O<sub>3</sub> (3.89 eV C<sub>1</sub> <sup>5</sup>A)**

|    |              |              |              |
|----|--------------|--------------|--------------|
| O  | -1.037501000 | -1.522956000 | 0.539003000  |
| O  | 2.193416000  | -1.108403000 | -0.797654000 |
| O  | 0.429383000  | 1.290940000  | 0.856905000  |
| Zn | -0.765327000 | 1.925368000  | -0.565373000 |
| Zn | 2.373958000  | 0.630209000  | -0.098532000 |
| Zn | 0.590754000  | -1.684943000 | -0.352328000 |
| Cu | -0.545093000 | -0.038470000 | 1.519988000  |
| Cu | -2.167456000 | -0.492415000 | -0.633748000 |

**Cu<sub>2</sub>Zn<sub>3</sub>O<sub>3</sub> (4.26 eV C<sub>1</sub> <sup>5</sup>A)**

|    |              |              |              |
|----|--------------|--------------|--------------|
| O  | 3.005857000  | 0.324552000  | -0.000052000 |
| O  | 0.106546000  | 2.449753000  | 0.000023000  |
| O  | -2.929863000 | 0.538165000  | 0.000047000  |
| Zn | 1.475310000  | 1.314426000  | -0.000021000 |
| Zn | -2.695724000 | -1.301948000 | -0.000002000 |
| Zn | -1.332984000 | 1.363672000  | 0.000022000  |
| Cu | 2.592325000  | -1.413262000 | 0.000053000  |
| Cu | -0.001235000 | -0.924127000 | -0.000057000 |

**Cu<sub>3</sub>Zn<sub>3</sub>O<sub>3</sub>**

**Cu<sub>3</sub>Zn<sub>3</sub>O<sub>3</sub> (0.00 eV C<sub>1</sub> <sup>2</sup>A)**

|    |              |              |              |
|----|--------------|--------------|--------------|
| O  | 2.092453000  | -0.040345000 | -0.856668000 |
| O  | -0.186096000 | 2.662376000  | -0.311489000 |
| O  | -2.120014000 | -0.061891000 | 0.838432000  |
| Zn | 1.127524000  | 1.485811000  | -0.642573000 |
| Zn | -1.800075000 | -1.278689000 | -0.728101000 |
| Zn | -1.411119000 | 1.524188000  | 0.339741000  |
| Cu | 0.501956000  | -1.126464000 | -1.157487000 |
| Cu | -0.315124000 | -0.674197000 | 1.389112000  |
| Cu | 2.027629000  | -0.696595000 | 0.925815000  |

**Cu<sub>3</sub>Zn<sub>3</sub>O<sub>3</sub> (0.20 eV C<sub>1</sub> <sup>2</sup>A)**

|    |              |              |              |
|----|--------------|--------------|--------------|
| O  | -0.169662000 | -2.171768000 | -0.512469000 |
| O  | -3.379422000 | -0.938970000 | 0.293117000  |
| O  | -1.800834000 | 2.205426000  | 0.085855000  |
| Zn | -1.828767000 | -1.763157000 | -0.066175000 |
| Zn | -0.078500000 | 1.699171000  | -0.151404000 |
| Zn | -2.811317000 | 0.751059000  | 0.226627000  |
| Cu | 0.908167000  | -0.763274000 | -0.262307000 |
| Cu | 3.215288000  | -0.893096000 | 0.412064000  |

|    |             |             |              |
|----|-------------|-------------|--------------|
| Cu | 2.233677000 | 1.195347000 | -0.122291000 |
|----|-------------|-------------|--------------|

**Cu<sub>3</sub>Zn<sub>3</sub>O<sub>3</sub> (0.20 eV C<sub>1</sub> <sup>2</sup>A)**

|    |              |              |              |
|----|--------------|--------------|--------------|
| O  | -2.028538000 | 2.059257000  | -0.096119000 |
| O  | -2.619891000 | -1.438262000 | -0.446527000 |
| O  | 0.714893000  | -1.954520000 | 0.568543000  |
| Zn | -2.441820000 | 0.349448000  | -0.292880000 |
| Zn | 2.234034000  | -1.196862000 | -0.412689000 |
| Zn | -0.992759000 | -1.992356000 | -0.000992000 |
| Cu | -0.243778000 | 2.057564000  | 0.112335000  |
| Cu | 2.071352000  | 1.259124000  | -0.352280000 |
| Cu | 0.499483000  | -0.011125000 | 0.963726000  |

**Cu<sub>3</sub>Zn<sub>3</sub>O<sub>3</sub> (0.22 eV C<sub>1</sub> <sup>2</sup>A)**

|    |              |              |              |
|----|--------------|--------------|--------------|
| O  | -2.967103000 | -1.010137000 | -0.020470000 |
| O  | -0.009170000 | -2.966903000 | 0.004350000  |
| O  | 1.912069000  | 0.027353000  | 0.038477000  |
| Zn | -1.616234000 | -2.131326000 | -0.009346000 |
| Zn | 3.723947000  | 0.432518000  | -0.023203000 |
| Zn | 1.066380000  | -1.571492000 | 0.019394000  |
| Cu | -2.030756000 | 0.547795000  | -0.007798000 |
| Cu | -1.303450000 | 2.781779000  | 0.003493000  |
| Cu | 0.344236000  | 1.143064000  | 0.011746000  |

**Cu<sub>3</sub>Zn<sub>3</sub>O<sub>3</sub> (0.30 eV C<sub>1</sub> <sup>2</sup>A)**

|    |              |              |              |
|----|--------------|--------------|--------------|
| O  | 0.407130000  | -2.122847000 | -0.202424000 |
| O  | 2.871816000  | 0.343604000  | -0.869447000 |
| O  | 0.392050000  | 2.385118000  | 0.585127000  |
| Zn | 1.803428000  | -1.071352000 | -0.658873000 |
| Zn | -0.823823000 | 1.004044000  | 0.710753000  |
| Zn | 1.809588000  | 1.603183000  | -0.144557000 |
| Cu | -1.156180000 | -1.074255000 | -0.598517000 |
| Cu | -2.813132000 | 0.565783000  | -0.694342000 |
| Cu | 0.071252000  | -1.247502000 | 1.523005000  |

**Cu<sub>3</sub>Zn<sub>3</sub>O<sub>3</sub> (0.31 eV C<sub>1</sub> <sup>2</sup>A)**

|    |              |              |              |
|----|--------------|--------------|--------------|
| O  | 0.905547000  | -1.755479000 | 0.582900000  |
| O  | -2.554381000 | -1.865867000 | -0.130576000 |
| O  | -2.407163000 | 1.661690000  | -0.157110000 |
| Zn | -0.807052000 | -2.048390000 | 0.186796000  |
| Zn | -0.630809000 | 1.973310000  | 0.012121000  |
| Zn | -2.698347000 | -0.085670000 | -0.174354000 |
| Cu | 1.190964000  | 0.122548000  | 0.314885000  |
| Cu | 1.667519000  | 2.367892000  | -0.035663000 |

|    |             |              |              |
|----|-------------|--------------|--------------|
| Cu | 2.539249000 | -1.783551000 | -0.386071000 |
|----|-------------|--------------|--------------|

**Cu<sub>3</sub>Zn<sub>3</sub>O<sub>3</sub> (0.33 eV C<sub>1</sub> <sup>2</sup>A)**

|    |              |              |              |
|----|--------------|--------------|--------------|
| O  | 0.591144000  | 2.328505000  | 0.593775000  |
| O  | 2.962918000  | 0.145163000  | -0.854349000 |
| O  | 0.364993000  | -2.058812000 | 0.039367000  |
| Zn | 1.936538000  | 1.461873000  | -0.164959000 |
| Zn | -0.137690000 | -0.936523000 | 1.645572000  |
| Zn | 1.832401000  | -1.201704000 | -0.569132000 |
| Cu | -2.872601000 | 0.490827000  | -0.627258000 |
| Cu | -0.793410000 | 1.177881000  | 0.372946000  |
| Cu | -1.171571000 | -1.083473000 | -0.627575000 |

**Cu<sub>3</sub>Zn<sub>3</sub>O<sub>3</sub> (0.44 eV C<sub>1</sub> <sup>2</sup>A)**

|    |              |              |              |
|----|--------------|--------------|--------------|
| O  | -3.024033000 | -0.273578000 | -0.741949000 |
| O  | -0.263526000 | -2.004564000 | 0.619485000  |
| O  | 2.859924000  | -0.941667000 | -0.575647000 |
| Zn | -1.819198000 | -1.440651000 | -0.190837000 |
| Zn | 2.282853000  | 0.806964000  | -0.283636000 |
| Zn | 1.397586000  | -1.806023000 | -0.084097000 |
| Cu | -2.002642000 | 1.168413000  | -0.207585000 |
| Cu | 0.325928000  | 2.181945000  | 0.053995000  |
| Cu | -0.130739000 | 0.061704000  | 0.924004000  |

**Cu<sub>3</sub>Zn<sub>3</sub>O<sub>3</sub> (0.45 eV C<sub>1</sub> <sup>2</sup>A)**

|    |              |              |              |
|----|--------------|--------------|--------------|
| O  | 0.706835000  | 2.482211000  | 0.062542000  |
| O  | -2.258148000 | 0.622024000  | -0.496475000 |
| O  | -0.149118000 | -2.161638000 | -0.175527000 |
| Zn | -0.841437000 | 1.684992000  | -0.184678000 |
| Zn | 1.344364000  | -1.201226000 | -0.045466000 |
| Zn | -1.710813000 | -1.241552000 | -0.163394000 |
| Cu | 1.898225000  | 1.138783000  | 0.086396000  |
| Cu | 3.588181000  | -0.506246000 | 0.130840000  |
| Cu | -3.767784000 | -0.108647000 | 0.357999000  |

**Cu<sub>3</sub>Zn<sub>3</sub>O<sub>3</sub> (0.47 eV C<sub>1</sub> <sup>2</sup>A)**

|    |              |              |              |
|----|--------------|--------------|--------------|
| O  | 1.837543000  | 2.283611000  | -0.000001000 |
| O  | -1.704096000 | 2.351171000  | 0.000001000  |
| O  | -1.284640000 | -1.130172000 | -0.000029000 |
| Zn | 0.076089000  | 2.428231000  | 0.000002000  |
| Zn | 0.526524000  | -1.191619000 | -0.000017000 |
| Zn | -2.152803000 | 0.606046000  | -0.000009000 |
| Cu | 2.185639000  | 0.533136000  | 0.000011000  |
| Cu | 2.819193000  | -1.747243000 | 0.000003000  |



|    |              |              |             |
|----|--------------|--------------|-------------|
| Cu | -3.083617000 | -1.658881000 | 0.000018000 |
|----|--------------|--------------|-------------|

**Cu<sub>3</sub>Zn<sub>3</sub>O<sub>3</sub> (0.80 eV C<sub>1</sub> <sup>2</sup>A)**

|    |              |              |              |
|----|--------------|--------------|--------------|
| O  | 0.782735000  | -1.837286000 | 0.100944000  |
| O  | 2.532962000  | 0.658363000  | 0.069984000  |
| O  | -0.473142000 | 2.527135000  | -0.138423000 |
| Zn | 2.047729000  | -0.937017000 | -1.164210000 |
| Zn | -1.593033000 | 1.121911000  | -0.068853000 |
| Zn | 1.153213000  | 1.788210000  | -0.040374000 |
| Cu | -0.903339000 | -1.205476000 | 0.055687000  |
| Cu | -3.190083000 | -0.592569000 | -0.062159000 |
| Cu | 1.645915000  | -0.615017000 | 1.314853000  |

**Cu<sub>3</sub>Zn<sub>3</sub>O<sub>3</sub> (1.74 eV C<sub>1</sub> <sup>4</sup>A)**

|    |              |              |              |
|----|--------------|--------------|--------------|
| O  | -0.919206000 | -1.859616000 | 0.438114000  |
| O  | 2.518412000  | -1.549810000 | -0.481381000 |
| O  | 2.121622000  | 1.944825000  | -0.104116000 |
| Zn | 0.828828000  | -1.906583000 | -0.051629000 |
| Zn | 0.307155000  | 1.893639000  | 0.172509000  |
| Zn | 2.555313000  | 0.236558000  | -0.314546000 |
| Cu | -2.220388000 | -1.032239000 | -0.581027000 |
| Cu | -1.893143000 | 1.322226000  | -0.549726000 |
| Cu | -0.731487000 | -0.117283000 | 1.371754000  |

**Cu<sub>3</sub>Zn<sub>3</sub>O<sub>3</sub> (1.76 eV C<sub>1</sub> <sup>4</sup>A)**

|    |              |              |              |
|----|--------------|--------------|--------------|
| O  | -2.502365000 | -1.304250000 | -0.024553000 |
| O  | -1.892157000 | 2.143987000  | -0.523248000 |
| O  | 1.316163000  | 1.419739000  | 0.772355000  |
| Zn | -2.397799000 | 0.434212000  | -0.345340000 |
| Zn | 0.705988000  | -0.404175000 | 1.421259000  |
| Zn | -0.212721000 | 2.065200000  | 0.057301000  |
| Cu | 1.231781000  | -1.418328000 | -0.878096000 |
| Cu | -0.863700000 | -2.003426000 | 0.150176000  |
| Cu | 2.451326000  | 0.630965000  | -0.506322000 |

**Cu<sub>3</sub>Zn<sub>3</sub>O<sub>3</sub> (1.84 eV C<sub>1</sub> <sup>4</sup>A)**

|    |              |              |              |
|----|--------------|--------------|--------------|
| O  | 2.489364000  | -0.312408000 | -0.562022000 |
| O  | 0.431976000  | 2.615345000  | -0.289491000 |
| O  | -2.095958000 | 0.353940000  | 0.825750000  |
| Zn | 1.619635000  | 1.277724000  | -0.489354000 |
| Zn | -3.065693000 | -0.666350000 | -0.431763000 |
| Zn | -0.961489000 | 1.675091000  | 0.295893000  |
| Cu | 0.940351000  | -1.316133000 | -1.203174000 |
| Cu | -0.522660000 | -0.863871000 | 0.697853000  |

|    |             |              |             |
|----|-------------|--------------|-------------|
| Cu | 1.845184000 | -0.918236000 | 1.159211000 |
|----|-------------|--------------|-------------|

**Cu<sub>3</sub>Zn<sub>3</sub>O<sub>3</sub> (1.85 eV C<sub>1</sub> <sup>4</sup>A)**

|    |              |              |              |
|----|--------------|--------------|--------------|
| O  | -2.395661000 | 1.437036000  | -0.413427000 |
| O  | -1.969555000 | -2.096305000 | -0.506304000 |
| O  | 1.327848000  | -1.560613000 | 0.735698000  |
| Zn | -2.351123000 | -0.341160000 | -0.489238000 |
| Zn | 2.542727000  | -0.652488000 | -0.459490000 |
| Zn | -0.309094000 | -2.102964000 | 0.138198000  |
| Cu | -0.919062000 | 1.944877000  | 0.461167000  |
| Cu | 1.360972000  | 1.678492000  | -0.655152000 |
| Cu | 0.517525000  | 0.192404000  | 1.083232000  |

**Cu<sub>3</sub>Zn<sub>3</sub>O<sub>3</sub> (2.24 eV C<sub>1</sub> <sup>4</sup>A)**

|    |              |              |              |
|----|--------------|--------------|--------------|
| O  | 1.263436000  | -2.315629000 | -0.461577000 |
| O  | 3.448316000  | 0.328595000  | 0.392850000  |
| O  | 0.604750000  | 2.394665000  | 0.056923000  |
| Zn | 2.543913000  | -1.144031000 | -0.014815000 |
| Zn | -0.764819000 | 1.246335000  | -0.339866000 |
| Zn | 2.138518000  | 1.548588000  | 0.268818000  |
| Cu | -0.260398000 | -1.378938000 | -0.538708000 |
| Cu | -3.082196000 | 0.722113000  | -0.205249000 |
| Cu | -2.176729000 | -1.163444000 | 0.836037000  |

**Cu<sub>3</sub>Zn<sub>3</sub>O<sub>3</sub> (2.32 eV C<sub>1</sub> <sup>4</sup>A)**

|    |              |              |              |
|----|--------------|--------------|--------------|
| O  | 2.386395000  | 1.503048000  | -0.423638000 |
| O  | -0.901923000 | 2.395718000  | 0.555442000  |
| O  | -1.532834000 | -1.029344000 | 0.154691000  |
| Zn | 0.767931000  | 2.082136000  | 0.087916000  |
| Zn | 0.188565000  | -1.280672000 | -0.415185000 |
| Zn | -1.919059000 | 0.898217000  | 0.360452000  |
| Cu | 2.216778000  | -0.177067000 | -0.966479000 |
| Cu | 2.146496000  | -1.457275000 | 1.129535000  |
| Cu | -3.354178000 | -0.915514000 | -0.276417000 |

**Cu<sub>3</sub>Zn<sub>3</sub>O<sub>3</sub> (4.27 eV C<sub>s</sub> <sup>6</sup>A')**

|    |              |              |             |
|----|--------------|--------------|-------------|
| O  | -0.286883000 | -1.933867000 | 0.000000000 |
| O  | -3.061370000 | 0.360412000  | 0.000000000 |
| O  | -0.538694000 | 2.831427000  | 0.000000000 |
| Zn | -1.816841000 | -0.912006000 | 0.000000000 |
| Zn | 0.834745000  | 1.600603000  | 0.000000000 |
| Zn | -1.994125000 | 1.811609000  | 0.000000000 |
| Cu | 0.834745000  | -1.324815000 | 1.409795000 |
| Cu | 2.481622000  | -0.283816000 | 0.000000000 |

|    |             |              |              |
|----|-------------|--------------|--------------|
| Cu | 0.834745000 | -1.324815000 | -1.409795000 |
|----|-------------|--------------|--------------|

**Cu<sub>3</sub>Zn<sub>3</sub>O<sub>3</sub> (4.80 eV C<sub>s</sub> <sup>6</sup>A')**

|    |              |              |              |
|----|--------------|--------------|--------------|
| O  | 2.455107000  | -0.123056000 | 0.000000000  |
| O  | 0.967758000  | -3.318309000 | 0.000000000  |
| O  | -2.113245000 | -1.593978000 | 0.000000000  |
| Zn | 1.923904000  | -1.822894000 | 0.000000000  |
| Zn | -1.498775000 | 0.132578000  | 0.000000000  |
| Zn | -0.697019000 | -2.654823000 | 0.000000000  |
| Cu | 1.314029000  | 1.240736000  | 0.000000000  |
| Cu | -0.697019000 | 2.321648000  | 1.134027000  |
| Cu | -0.697019000 | 2.321648000  | -1.134027000 |

**Cu<sub>3</sub>Zn<sub>3</sub>O<sub>3</sub> (4.89 eV C<sub>1</sub> <sup>6</sup>A)**

|    |              |              |              |
|----|--------------|--------------|--------------|
| O  | -2.817707000 | -0.892442000 | -0.141591000 |
| O  | 0.050768000  | -2.975700000 | -0.323072000 |
| O  | 1.959223000  | -0.070109000 | 0.464953000  |
| Zn | -1.508296000 | -2.083638000 | -0.284334000 |
| Zn | 3.592854000  | 0.665001000  | -0.012679000 |
| Zn | 1.171121000  | -1.649059000 | 0.050971000  |
| Cu | -2.108196000 | 0.540133000  | 0.694424000  |
| Cu | -1.374582000 | 2.602630000  | -0.465729000 |
| Cu | 0.337652000  | 1.117130000  | 0.025751000  |

**Cu<sub>4</sub>Zn<sub>3</sub>O<sub>3</sub>**

**Cu<sub>4</sub>Zn<sub>3</sub>O<sub>3</sub> (0.00 eV C<sub>1</sub> <sup>1</sup>A)**

|    |              |              |              |
|----|--------------|--------------|--------------|
| O  | 0.240771000  | 2.246950000  | 0.653081000  |
| O  | 1.977586000  | 0.678924000  | -2.032793000 |
| O  | 0.627996000  | -2.167374000 | -0.398766000 |
| Zn | 1.202159000  | 1.711459000  | -0.785647000 |
| Zn | 1.117511000  | -1.532332000 | 1.444029000  |
| Zn | 1.418249000  | -0.917108000 | -1.442366000 |
| Cu | 0.817032000  | 0.755601000  | 1.733184000  |
| Cu | -1.051809000 | -1.230210000 | -0.321771000 |
| Cu | -1.288899000 | 1.169691000  | 0.250394000  |
| Cu | -3.128338000 | -0.140894000 | -0.360175000 |

**Cu<sub>4</sub>Zn<sub>3</sub>O<sub>3</sub> (0.10 eV C<sub>1</sub> <sup>1</sup>A)**

|    |              |              |              |
|----|--------------|--------------|--------------|
| O  | 0.197462000  | 1.929077000  | 0.934138000  |
| O  | -2.842697000 | 1.507508000  | -0.855068000 |
| O  | -2.504142000 | -1.992173000 | -0.443520000 |
| Zn | -1.332457000 | 1.929182000  | -0.013101000 |
| Zn | -0.847343000 | -1.946200000 | 0.340078000  |

|    |              |              |              |
|----|--------------|--------------|--------------|
| Zn | -2.875314000 | -0.284126000 | -0.749098000 |
| Cu | 0.029833000  | 0.053275000  | 1.387185000  |
| Cu | 1.511220000  | -1.246677000 | 0.075653000  |
| Cu | 1.728297000  | 1.240152000  | 0.001638000  |
| Cu | 3.380597000  | -0.133682000 | -0.927261000 |

**Cu<sub>4</sub>Zn<sub>3</sub>O<sub>3</sub> (0.41 eV C<sub>1</sub> <sup>1</sup>A)**

|    |              |              |              |
|----|--------------|--------------|--------------|
| O  | 0.254244000  | 2.345292000  | -0.035309000 |
| O  | -1.181022000 | -2.073804000 | 0.072571000  |
| O  | 1.628571000  | -0.475073000 | -1.679984000 |
| Zn | 0.691335000  | 1.112675000  | 1.460271000  |
| Zn | 0.899701000  | 1.147935000  | -1.272253000 |
| Zn | -2.337475000 | -0.559799000 | -0.168945000 |
| Cu | 2.037228000  | -0.603533000 | 0.282907000  |
| Cu | -0.087517000 | -1.186556000 | 1.383833000  |
| Cu | -1.538143000 | 1.602971000  | -0.154155000 |
| Cu | 0.167012000  | -1.516181000 | -1.079151000 |

**Cu<sub>4</sub>Zn<sub>3</sub>O<sub>3</sub> (0.43 eV C<sub>1</sub> <sup>1</sup>A)**

|    |              |              |              |
|----|--------------|--------------|--------------|
| O  | -0.219082000 | 1.976280000  | 0.470414000  |
| O  | 3.212157000  | 1.553102000  | -0.265113000 |
| O  | 2.706106000  | -1.938625000 | -0.079425000 |
| Zn | 1.510025000  | 1.961308000  | 0.056511000  |
| Zn | 0.890889000  | -1.959309000 | 0.107809000  |
| Zn | 3.177449000  | -0.236635000 | -0.202780000 |
| Cu | -0.604678000 | 0.077634000  | 0.467022000  |
| Cu | -1.497143000 | -1.954552000 | -0.092663000 |
| Cu | -3.224753000 | -0.182054000 | -0.165995000 |
| Cu | -2.016334000 | 1.862869000  | -0.203302000 |

**Cu<sub>4</sub>Zn<sub>3</sub>O<sub>3</sub> (0.61 eV C<sub>s</sub> <sup>1</sup>A')**

|    |              |              |              |
|----|--------------|--------------|--------------|
| O  | 0.931242000  | 2.074114000  | 0.000000000  |
| O  | -2.611534000 | 1.910019000  | 0.000000000  |
| O  | -1.865102000 | -1.533913000 | 0.000000000  |
| Zn | -0.863460000 | 2.261723000  | 0.000000000  |
| Zn | -0.017891000 | -1.333231000 | 0.000000000  |
| Zn | -2.512574000 | 0.110963000  | 0.000000000  |
| Cu | 1.122249000  | 0.614083000  | 1.238975000  |
| Cu | 1.122249000  | 0.614083000  | -1.238975000 |
| Cu | 1.122249000  | -1.489694000 | 2.210233000  |
| Cu | 1.122249000  | -1.489694000 | -2.210233000 |

**Cu<sub>4</sub>Zn<sub>3</sub>O<sub>3</sub> (0.71 eV C<sub>1</sub> <sup>1</sup>A)**

|   |             |              |              |
|---|-------------|--------------|--------------|
| O | 1.330156000 | -2.606936000 | -0.772788000 |
|---|-------------|--------------|--------------|

|    |              |              |              |
|----|--------------|--------------|--------------|
| O  | 3.622343000  | -0.077652000 | 0.166641000  |
| O  | 1.402063000  | 2.651828000  | 0.480384000  |
| Zn | 2.523919000  | -1.414895000 | -0.289853000 |
| Zn | -0.269881000 | 2.170352000  | 0.081471000  |
| Zn | 2.606677000  | 1.355778000  | 0.348886000  |
| Cu | -0.302896000 | -2.117695000 | -0.222043000 |
| Cu | -1.502535000 | -0.047703000 | -0.045490000 |
| Cu | -2.467424000 | -2.058671000 | 0.680164000  |
| Cu | -2.508453000 | 2.049069000  | -0.523287000 |

**Cu<sub>4</sub>Zn<sub>3</sub>O<sub>3</sub> (0.88 eV C<sub>s</sub> <sup>1</sup>A')**

|    |              |              |              |
|----|--------------|--------------|--------------|
| O  | -2.040959000 | 1.548749000  | 0.000000000  |
| O  | -3.180665000 | -1.804991000 | 0.000000000  |
| O  | -0.107139000 | -3.549502000 | 0.000000000  |
| Zn | -2.659118000 | -0.104565000 | 0.000000000  |
| Zn | 1.054039000  | -2.142178000 | 0.000000000  |
| Zn | -1.721177000 | -2.821946000 | 0.000000000  |
| Cu | -0.263722000 | 1.643341000  | 0.000000000  |
| Cu | 1.724893000  | 0.079959000  | 0.000000000  |
| Cu | 1.724893000  | 2.285016000  | 1.165352000  |
| Cu | 1.724893000  | 2.285016000  | -1.165352000 |

**Cu<sub>4</sub>Zn<sub>3</sub>O<sub>3</sub> (1.07 eV C<sub>1</sub> <sup>1</sup>A)**

|    |              |              |              |
|----|--------------|--------------|--------------|
| O  | 0.885096000  | 2.134394000  | 0.902690000  |
| O  | -0.620968000 | -0.887788000 | 1.817606000  |
| O  | -1.461001000 | -1.379440000 | -1.077371000 |
| Zn | -0.054145000 | 0.816904000  | 1.764166000  |
| Zn | -1.559283000 | 0.446139000  | -1.659654000 |
| Zn | 0.188558000  | -1.296885000 | -0.076963000 |
| Cu | 1.812310000  | 0.707568000  | 0.008270000  |
| Cu | -0.337760000 | 2.104264000  | -0.602804000 |
| Cu | 2.533113000  | -1.439928000 | -0.607303000 |
| Cu | -2.203487000 | -1.300252000 | 0.720118000  |

**Cu<sub>4</sub>Zn<sub>3</sub>O<sub>3</sub> (1.20 eV C<sub>1</sub> <sup>3</sup>A)**

|    |              |              |              |
|----|--------------|--------------|--------------|
| O  | 1.642767000  | 1.844459000  | -0.485411000 |
| O  | -1.869912000 | 2.442067000  | -0.340143000 |
| O  | -2.933091000 | -0.850004000 | 0.410987000  |
| Zn | -0.109743000 | 2.258294000  | -0.427153000 |
| Zn | -1.351530000 | -1.764673000 | 0.441257000  |
| Zn | -2.554247000 | 0.838499000  | 0.045426000  |
| Cu | 2.010090000  | 1.008341000  | 1.176684000  |
| Cu | 1.527311000  | 0.002648000  | -1.097113000 |
| Cu | 0.929985000  | -1.148377000 | 1.051908000  |

|    |             |              |              |
|----|-------------|--------------|--------------|
| Cu | 0.558389000 | -2.188674000 | -1.078698000 |
|----|-------------|--------------|--------------|

**Cu<sub>4</sub>Zn<sub>3</sub>O<sub>3</sub> (1.27 eV C<sub>1</sub> <sup>1</sup>A)**

|    |              |              |              |
|----|--------------|--------------|--------------|
| O  | 2.418108000  | -1.028448000 | -0.594172000 |
| O  | 1.446439000  | 2.380427000  | -0.929692000 |
| O  | -1.416721000 | 1.584470000  | 1.028751000  |
| Zn | 2.117696000  | 0.713619000  | -0.902834000 |
| Zn | -1.936949000 | -1.518167000 | -0.747728000 |
| Zn | -0.038821000 | 2.191851000  | 0.037954000  |
| Cu | 1.821494000  | -0.931825000 | 1.308440000  |
| Cu | 0.541774000  | -1.714731000 | -0.521141000 |
| Cu | -0.547663000 | -0.228185000 | 1.068587000  |
| Cu | -2.637688000 | 0.629543000  | -0.051086000 |

**Cu<sub>4</sub>Zn<sub>3</sub>O<sub>3</sub> (1.29 eV C<sub>1</sub> <sup>3</sup>A)**

|    |              |              |              |
|----|--------------|--------------|--------------|
| O  | -0.429740000 | 1.837484000  | 0.719671000  |
| O  | 2.963970000  | 1.714592000  | -0.331687000 |
| O  | 2.749365000  | -1.813528000 | -0.241028000 |
| Zn | 1.269719000  | 1.974583000  | 0.144088000  |
| Zn | 0.971301000  | -1.912527000 | 0.167345000  |
| Zn | 3.086457000  | -0.074401000 | -0.342666000 |
| Cu | -0.590664000 | -0.069096000 | 0.598855000  |
| Cu | -1.469401000 | -2.182884000 | 0.023116000  |
| Cu | -2.847799000 | -0.238390000 | -0.463751000 |
| Cu | -2.060861000 | 2.023541000  | -0.166450000 |

**Cu<sub>4</sub>Zn<sub>3</sub>O<sub>3</sub> (1.64 eV C<sub>1</sub> <sup>1</sup>A)**

|    |              |              |              |
|----|--------------|--------------|--------------|
| O  | 1.973210000  | -0.115534000 | 0.019518000  |
| O  | -0.428347000 | 2.595987000  | -0.405081000 |
| O  | -2.808106000 | 0.022821000  | -0.134594000 |
| Zn | 0.798714000  | 1.349913000  | 0.071000000  |
| Zn | -1.841906000 | -1.360069000 | -1.249214000 |
| Zn | -1.887693000 | 1.557567000  | -0.371559000 |
| Cu | 0.830681000  | -0.558384000 | 1.919547000  |
| Cu | 0.402213000  | -1.299792000 | -0.514781000 |
| Cu | -1.394079000 | -0.454389000 | 1.200595000  |
| Cu | 3.541615000  | 0.021237000  | -0.858655000 |

**Cu<sub>4</sub>Zn<sub>3</sub>O<sub>3</sub> (1.79 eV C<sub>1</sub> <sup>3</sup>A)**

|    |              |              |              |
|----|--------------|--------------|--------------|
| O  | -1.069296000 | 2.013343000  | 0.485207000  |
| O  | 0.042666000  | -2.058879000 | -0.437167000 |
| O  | 1.830147000  | 1.016569000  | -1.339856000 |
| Zn | -0.847942000 | 0.413293000  | 1.688249000  |
| Zn | 0.402229000  | 1.790073000  | -0.539360000 |

|    |              |              |              |
|----|--------------|--------------|--------------|
| Zn | -1.765660000 | -1.464351000 | -0.636678000 |
| Cu | 2.574002000  | 0.265472000  | 0.333206000  |
| Cu | 0.869488000  | -1.374661000 | 1.126038000  |
| Cu | -2.346257000 | 0.758558000  | -0.335471000 |
| Cu | 0.968735000  | -0.681739000 | -1.297283000 |

**Cu<sub>4</sub>Zn<sub>3</sub>O<sub>3</sub> (1.80 eV C<sub>1</sub> <sup>3</sup>A)**

|    |              |              |              |
|----|--------------|--------------|--------------|
| O  | 0.975856000  | 1.761929000  | -0.829562000 |
| O  | 2.124413000  | -1.538600000 | -1.514693000 |
| O  | -0.135027000 | -1.907761000 | 1.164974000  |
| Zn | 1.783589000  | 0.223216000  | -1.390837000 |
| Zn | 0.080919000  | -0.017138000 | 1.892660000  |
| Zn | 1.047582000  | -2.057388000 | -0.180030000 |
| Cu | 1.648122000  | 1.765985000  | 0.945505000  |
| Cu | -1.645174000 | -1.009799000 | 0.345497000  |
| Cu | -0.788815000 | 1.129084000  | -0.525886000 |
| Cu | -3.044638000 | 0.494548000  | -0.772686000 |

**Cu<sub>4</sub>Zn<sub>3</sub>O<sub>3</sub> (1.90 eV C<sub>1</sub> <sup>1</sup>A)**

|    |              |              |              |
|----|--------------|--------------|--------------|
| O  | 0.362250000  | -2.644016000 | -0.030156000 |
| O  | -2.471504000 | -0.468489000 | -0.292823000 |
| O  | -1.468927000 | 2.942375000  | -0.047712000 |
| Zn | -0.951909000 | -1.522443000 | -0.149126000 |
| Zn | 0.377427000  | 2.543368000  | 0.069088000  |
| Zn | -2.118042000 | 1.329972000  | -0.162974000 |
| Cu | 1.848946000  | -1.568591000 | 0.004058000  |
| Cu | 2.038291000  | 0.887374000  | 0.095045000  |
| Cu | 3.937662000  | -0.532426000 | 0.010442000  |
| Cu | -4.052444000 | -1.171387000 | 0.244106000  |

**Cu<sub>4</sub>Zn<sub>3</sub>O<sub>3</sub> (2.17 eV C<sub>1</sub> <sup>1</sup>A)**

|    |              |              |              |
|----|--------------|--------------|--------------|
| O  | 0.167639000  | 1.906911000  | 0.707513000  |
| O  | 1.922941000  | -0.775165000 | -0.618896000 |
| O  | -1.452332000 | -1.916901000 | -0.807600000 |
| Zn | 1.718291000  | 0.948158000  | 0.364381000  |
| Zn | -2.067944000 | -1.467068000 | 1.070684000  |
| Zn | 0.323389000  | -1.563333000 | -0.841043000 |
| Cu | -0.880752000 | 2.228938000  | -0.809872000 |
| Cu | -1.151768000 | 0.684179000  | 1.321040000  |
| Cu | -1.720639000 | 0.007402000  | -1.135559000 |
| Cu | 3.604261000  | -0.549880000 | 0.208225000  |

**Cu<sub>4</sub>Zn<sub>3</sub>O<sub>3</sub> (2.20 eV C<sub>1</sub> <sup>1</sup>A)**

|   |              |              |              |
|---|--------------|--------------|--------------|
| O | -1.630662000 | -1.645683000 | -1.034035000 |
|---|--------------|--------------|--------------|



|    |              |              |              |
|----|--------------|--------------|--------------|
| O  | 1.812768000  | -1.062042000 | 0.073063000  |
| O  | 0.379962000  | 1.928456000  | 0.947659000  |
| Zn | 0.075397000  | -1.533308000 | -0.321762000 |
| Zn | -0.804288000 | 2.232785000  | -0.626919000 |
| Zn | 1.783953000  | 0.817516000  | 0.556686000  |
| Cu | -2.224447000 | -1.385166000 | 0.779622000  |
| Cu | -1.773693000 | 0.238050000  | -1.335059000 |
| Cu | -0.786299000 | 0.432118000  | 1.427165000  |
| Cu | 3.537943000  | -0.639335000 | -0.462544000 |

**Cu<sub>4</sub>Zn<sub>3</sub>O<sub>3</sub> (3.41 eV C<sub>1</sub> <sup>5</sup>A)**

|    |              |              |              |
|----|--------------|--------------|--------------|
| O  | -1.320854000 | 1.396983000  | 0.842083000  |
| O  | 0.304614000  | -2.174232000 | -0.912752000 |
| O  | 1.350618000  | 1.312173000  | -1.105279000 |
| Zn | -0.043458000 | 0.253957000  | 1.765670000  |
| Zn | -0.381298000 | 2.212403000  | -0.781330000 |
| Zn | -1.412530000 | -1.635330000 | -0.541236000 |
| Cu | 2.291517000  | 0.689982000  | 0.367518000  |
| Cu | 1.277015000  | -1.495050000 | 0.687493000  |
| Cu | -2.587904000 | 0.236329000  | 0.281128000  |
| Cu | 0.827772000  | -0.438513000 | -1.470123000 |

**Cu<sub>4</sub>Zn<sub>3</sub>O<sub>3</sub> (3.43 eV C<sub>1</sub> <sup>5</sup>A)**

|    |              |              |              |
|----|--------------|--------------|--------------|
| O  | 0.897065000  | 1.874955000  | 0.798986000  |
| O  | -2.559244000 | 1.608196000  | -0.259858000 |
| O  | -2.270120000 | -1.901724000 | 0.189485000  |
| Zn | -0.805125000 | 1.862070000  | 0.048759000  |
| Zn | -0.432292000 | -1.806692000 | 0.259068000  |
| Zn | -2.655041000 | -0.178071000 | -0.094090000 |
| Cu | 0.743346000  | 0.116467000  | 1.633870000  |
| Cu | 1.937034000  | -1.340186000 | -0.103499000 |
| Cu | 2.089077000  | 1.105279000  | -0.406845000 |
| Cu | 0.341996000  | -0.190892000 | -1.545630000 |

**Cu<sub>4</sub>Zn<sub>3</sub>O<sub>3</sub> (3.58 eV C<sub>s</sub> <sup>5</sup>A')**

|    |              |              |              |
|----|--------------|--------------|--------------|
| O  | 1.240291000  | 1.972973000  | 0.000000000  |
| O  | -2.254006000 | 2.627943000  | 0.000000000  |
| O  | -2.663998000 | -0.887196000 | 0.000000000  |
| Zn | -0.481364000 | 2.535859000  | 0.000000000  |
| Zn | -0.900441000 | -1.421039000 | 0.000000000  |
| Zn | -2.687111000 | 0.880568000  | 0.000000000  |
| Cu | 1.305941000  | 0.413491000  | 1.159472000  |
| Cu | 1.305941000  | 0.413491000  | -1.159472000 |
| Cu | 1.305941000  | -1.957826000 | 1.158826000  |

|    |             |              |              |
|----|-------------|--------------|--------------|
| Cu | 1.305941000 | -1.957826000 | -1.158826000 |
|----|-------------|--------------|--------------|

**Cu<sub>4</sub>Zn<sub>3</sub>O<sub>3</sub> (3.59 eV C<sub>1</sub> <sup>5</sup>A)**

|    |              |              |              |
|----|--------------|--------------|--------------|
| O  | -1.089817000 | 1.947741000  | 0.662855000  |
| O  | 2.365879000  | 2.285906000  | -0.188424000 |
| O  | 3.134899000  | -1.167417000 | -0.412829000 |
| Zn | 0.643558000  | 2.242393000  | 0.223469000  |
| Zn | 1.563791000  | -2.050977000 | -0.124733000 |
| Zn | 2.878631000  | 0.577381000  | -0.314380000 |
| Cu | -0.811920000 | -0.024792000 | 1.037580000  |
| Cu | -0.746820000 | -2.277818000 | 0.270880000  |
| Cu | -2.507593000 | -0.866145000 | -0.568639000 |
| Cu | -2.411841000 | 1.527590000  | -0.533735000 |

**Cu<sub>4</sub>Zn<sub>3</sub>O<sub>3</sub> (4.18 eV C<sub>1</sub> <sup>5</sup>A)**

|    |              |              |              |
|----|--------------|--------------|--------------|
| O  | 1.064930000  | 1.573186000  | -0.995420000 |
| O  | 2.025553000  | -1.828606000 | -1.354356000 |
| O  | -0.264716000 | -1.701751000 | 1.325082000  |
| Zn | 1.816677000  | -0.035455000 | -1.464231000 |
| Zn | 0.236155000  | 0.247588000  | 1.888802000  |
| Zn | 0.914548000  | -2.100627000 | 0.016705000  |
| Cu | 1.844372000  | 1.759335000  | 0.712416000  |
| Cu | -1.698904000 | -0.779075000 | 0.502568000  |
| Cu | -0.812789000 | 1.129315000  | -0.615708000 |
| Cu | -3.181904000 | 0.383949000  | -0.773094000 |
